# Supplementary material
Source: publisher figshare collection journal article supplement (https://geolsoc.figshare.com/ndownloader/files/34180012)
Supplement: Supplementary file 1 [file 34180012]

## Sheet: Without data (priors)
Independent rate model CAT-GTR tree No molecular data Uniform calibrations
Ages in millions of years
	Node	Mean	Confidence intervaI width	Lower estimate	Upper estimate
	80	737.02	197.31	638.2	835.51
	81	683.85	163.72	630.48	794.2
	82	633.4	22.68	619.39	642.07
	83	627.84	26.55	610.63	637.18
	84	568.43	107.27	519.44	626.71
	85	437.45	32.16	421.5	453.66
	86	114.42	100.31	64.28	164.59
	87	622.44	32.32	602.47	634.79
	88	596.45	71.31	556.34	627.65
	89	569.92	74.48	538.67	613.15
	90	540.05	16.52	532.36	548.88
	91	501.83	59.54	471.76	531.3
	92	524.03	105.85	479.13	584.98
	93	405.84	222.43	309.66	532.09
	94	616.16	38.81	593.03	631.84	Ecdysozoa
	95	583.82	89.74	532.75	622.49	Scalidophora
	96	553.98	87.09	518.85	605.94	Priapulida + Kinorhyncha
	97	452.9	247.81	319.34	567.15	Priapulida
	98	322.6	480.28	36.18	516.46
	99	459.01	318.61	253.01	571.62
	100	328.68	487.55	35.46	523.01
	101	608.85	45.64	582.34	627.98	Cryptovermes
	102	548.12	180.84	433.75	614.59	Nematoida
	103	301.36	439.05	108.22	547.27	Nematomorpha
	104	483.84	266.4	323.83	590.23	Nematoda
	105	364.84	381.77	157.2	538.97
	106	256.82	459.98	17.98	477.96
	107	393.54	344.6	202.12	546.72
	108	256.45	322.16	134.39	456.55
	109	279.41	464.39	23.69	488.08
	110	600.78	52.03	571.3	623.33	Panarthropoda
	111	549.46	174.33	435.1	609.43	Tardigrada
	112	456.54	334.08	246.13	580.21
	113	326.63	495.41	34.55	529.96
	114	482.51	259.47	325.47	584.94
	115	404.43	380.12	168.29	548.41
	116	287.5	475.44	21.66	497.1
	117	591.62	57.97	559.69	617.66	Onychophora + Arthropoda
	118	441.08	404.71	185.57	590.28	Onychophora
	119	312.66	508.05	28.66	536.71
	120	582.27	61.95	549.25	611.2	Arthropoda (Euarthropoda)
	121	558.72	79.85	518.24	598.09	Chelicerata
	122	492.85	134.77	432.77	567.54
	123	534.53	77.06	502.67	579.73
	124	503.07	103.13	451.56	554.69
	125	358.15	459.74	55.29	515.03
	126	468.36	74.64	436.56	511.2
	127	376.74	175.06	302.05	477.11
	128	569.44	68.31	534.12	602.43	Mandibulata
	129	537.58	110.83	475.28	586.11
	130	487.82	135.55	421.91	557.46
	131	432.45	125.13	384.71	509.84
	132	491.57	131.64	428.97	560.61
	133	351.37	467.58	50.66	518.24
	134	351.49	465.03	53.94	518.97
	135	552.82	71.47	518.58	590.05	Pancrustacea
	136	460.48	305.88	258.27	564.15
	137	329.2	489.5	34.54	524.04
	138	535.24	87.27	489.62	576.89
	139	446.43	308.5	241.67	550.17
	140	319	475.9	33.56	509.46
	141	516.39	93.16	465.98	559.14
	142	462.33	110.32	408.3	518.62
	143	330.03	437.46	47.2	484.66
	144	488.61	86.31	435.93	522.24
	145	465.36	96.27	415.23	511.5
	146	442.19	101.13	393.71	494.84
	147	377	135.48	322.34	457.82
	148	416.13	97.56	370.59	468.15
	149	369.21	86.73	323.66	410.39
	150	314.47	221.24	173.12	394.36
	151	225.06	217.38	134.32	351.7
	152	386.01	68.46	343.88	412.34
	153	367.45	76.65	327.45	404.1
	154	260.51	357.21	24.88	382.09
	155	348.35	73.6	316.78	390.38
	156	273.67	151.2	205.13	356.33
	157	327.07	59.47	307.64	367.11

## Sheet: Vanilla
Independent rate model CAT-GTR tree No partitioning Uniform calibrations
All ages in 100s of millions of years
	Node	Mean	Confidence intervaI width	Lower estimate	Upper estimate
	80	7.5725	1.6207	6.7317	8.3524
	81	7.0737	1.3046	6.5699	7.8745
	82	6.4257	0.236	6.3244	6.5604
	83	6.2881	0.2193	6.1673	6.3866
	84	5.6165	0.8759	5.2031	6.079
	85	4.3541	0.3193	4.213	4.5323
	86	0.8058	0.6916	0.621	1.3126
	87	6.1787	0.2549	6.0403	6.2952
	88	5.9654	0.3996	5.7501	6.1497
	89	5.7275	0.424	5.5196	5.9436
	90	5.3907	0.1624	5.3227	5.4851
	91	4.9399	0.5172	4.7153	5.2325
	92	5.0737	0.7228	4.7806	5.5034
	93	4.381	1.8146	3.2929	5.1075
	94	6.0777	0.2848	5.9248	6.2096	Ecdysozoa
	95	5.7751	0.6076	5.4373	6.0449	Scalidophora
	96	5.4466	0.6306	5.1867	5.8173	Priapulida + Kinorhyncha
	97	4.356	2.1111	3.1727	5.2838	Priapulida
	98	0.7076	1.5208	0.2211	1.7419
	99	3.9977	2.4798	2.5912	5.071
	100	1.3159	2.6401	0.3682	3.0083
	101	5.9816	0.3109	5.8144	6.1253	Cryptovermes
	102	5.2667	1.083	4.6739	5.7569	Nematoida
	103	3.5088	2.8541	1.9645	4.8186	Nematomorpha
	104	4.388	1.6031	3.5482	5.1513	Nematoda
	105	3.5383	2.0998	2.4998	4.5996
	106	2.2074	2.3644	1.1106	3.475
	107	3.0154	1.9351	2.1723	4.1074
	108	1.9944	1.7487	1.3429	3.0916
	109	1.9685	2.3227	0.9419	3.2646
	110	5.892	0.3304	5.7162	6.0466	Panarthropoda
	111	4.8471	1.5545	3.9252	5.4797	Tardigrada
	112	3.3859	2.425	2.0654	4.4904
	113	0.7217	1.4554	0.2476	1.703
	114	3.6403	2.1837	2.4153	4.599
	115	2.5596	2.4585	1.3268	3.7853
	116	1.9093	2.4697	0.7496	3.2193
	117	5.7741	0.3506	5.5901	5.9407	Onychophora + Arthropoda
	118	2.2745	2.513	1.4551	3.9681	Onychophora
	119	0.6158	1.2551	0.1975	1.4526
	120	5.6365	0.3466	5.46	5.8066	Arthropoda (Euarthropoda)
	121	5.4382	0.42	5.2287	5.6487	Chelicerata
	122	4.5584	0.691	4.3065	4.9975
	123	5.1201	0.3327	5.0091	5.3418
	124	4.8415	0.5429	4.566	5.1089
	125	4.2435	1.7586	3.0633	4.8219
	126	4.5466	0.4973	4.3591	4.8564
	127	3.4854	1.1856	3.0064	4.192
	128	5.5189	0.3624	5.3379	5.7003	Mandibulata
	129	5.1262	0.6698	4.7669	5.4367
	130	4.6299	0.834	4.2258	5.0598
	131	4.0341	0.6581	3.8335	4.4916
	132	4.6071	0.7952	4.265	5.0602
	133	3.2924	2.8438	1.5503	4.3941
	134	4.0923	1.7124	3.0361	4.7485
	135	5.2879	0.3464	5.1477	5.4941	Pancrustacea
	136	3.1804	2.958	1.494	4.452
	137	2.2567	2.9599	0.7914	3.7513
	138	5.1071	0.4788	4.8766	5.3554
	139	4.6032	1.3518	3.7387	5.0905
	140	2.9022	2.7628	1.3338	4.0966
	141	4.9608	0.5154	4.7035	5.2189
	142	4.284	0.6194	4.0586	4.678
	143	0.5858	1.3136	0.1859	1.4995
	144	4.7297	0.5938	4.4226	5.0164
	145	4.4529	0.6156	4.148	4.7636
	146	4.1861	0.6031	3.8972	4.5003
	147	3.6747	0.9394	3.2285	4.1679
	148	3.9598	0.559	3.6996	4.2586
	149	3.501	0.7243	3.2166	3.9409
	150	3.0484	1.498	2.163	3.661
	151	2.085	1.6839	1.3419	3.0258
	152	3.8004	0.5282	3.5546	4.0828
	153	3.6048	0.513	3.375	3.888
	154	2.8888	1.7606	1.7854	3.546
	155	3.377	0.4466	3.1938	3.6404
	156	2.4632	0.9852	2.0357	3.0209
	157	3.1501	0.2827	3.0712	3.3539

## Sheet: 2Partitions
Independent rate model CAT-GTR tree 2 partitions Uniform calibrations
All ages in millions of years
	Node	Mean	Confidence intervaI width	Lower estimate	Upper estimate
	81	722.56	100.59	681.53	782.12
	82	658.83	30.51	644.57	675.08
	83	636.73	19.71	626.85	646.56
	84	565.85	79.4	524.14	603.54
	85	433.14	31.2	421.13	452.33
	86	69.12	27.2	61.79	88.99
	87	623.19	21.04	612.3	633.34
	88	601.13	31.11	584.76	615.87
	89	575.02	33.46	558.72	592.18
	90	537.79	15.6	532.19	547.79
	91	489.22	42.22	471.2	513.42
	92	502.15	62.38	477.85	540.23
	93	452.67	116.19	387.42	503.61
	94	611.59	22.92	599.64	622.56	Ecdysozoa
	95	583.78	48.94	555.55	604.49	Scalidophora
	96	550.62	59.56	520.66	580.22	Priapulida + Kinorhyncha
	97	460.2	170.63	354.37	525	Priapulida
	98	51.67	62.61	27.24	89.85
	99	417.08	181.57	312.42	493.99
	100	159.17	202.38	56.74	259.12
	101	600.91	24.26	588.28	612.54	Cryptovermes
	102	534.34	80.82	489.11	569.93	Nematoida
	103	376.43	201.75	269.55	471.3	Nematomorpha
	104	443.94	113.5	384.16	497.66	Nematoda
	105	371.57	144.15	297.74	441.89
	106	227.75	159.1	159.39	318.49
	107	300.65	130.37	239.35	369.72
	108	199.62	128.71	141.31	270.02
	109	199.9	138.23	133.9	272.13
	110	591.09	25.32	578.21	603.53	Panarthropoda
	111	471.93	113.37	410.35	523.72	Tardigrada
	112	323.8	183.39	225.55	408.94
	113	56.46	66.22	30.95	97.17
	114	337.67	147.38	267.48	414.86
	115	230.56	146.64	165.32	311.96
	116	180.24	142.64	111.62	254.26
	117	577.81	26.27	564.6	590.87	Onychophora + Arthropoda
	118	189.38	144.36	143.96	288.32	Onychophora
	119	40.87	48.92	20.79	69.71
	120	561.53	26.54	548.64	575.18	Arthropoda (Euarthropoda)
	121	541.43	30.64	526.54	557.18	Chelicerata
	122	443.88	44.9	430.22	475.12
	123	506.58	19.45	500.69	520.14
	124	478.7	38.3	459.27	497.57
	125	440.74	80.88	391.64	472.52
	126	448.89	35.77	435.73	471.5
	127	331.94	93.55	299.97	393.52
	128	549.38	27.36	536.32	563.68	Mandibulata
	129	506.74	51.48	480.73	532.21
	130	455.56	64.25	425.39	489.64
	131	394.83	39.92	383.06	422.98
	132	452.68	63.32	426.2	489.52
	133	318.29	222.34	190.41	412.75
	134	420.39	95.19	368.08	463.27
	135	522.75	23.89	514.37	538.26	Pancrustacea
	136	270.23	182.73	181.11	363.84
	137	193.52	177.56	112.54	290.1
	138	504.48	33.06	488.57	521.63
	139	463.78	73.09	422.48	495.57
	140	279.9	188.32	179.56	367.88
	141	490.44	35.89	472.75	508.64
	142	419.49	42.56	405.48	448.04
	143	42.14	49.14	21.8	70.94
	144	467.62	41.48	447.04	488.52
	145	438.52	45.33	415.94	461.27
	146	410.34	44.06	388.93	432.99
	147	366.79	78.95	325.25	404.2
	148	388.36	41.42	368.8	410.22
	149	340.9	49.78	321.02	370.8
	150	310.49	83.23	262.2	345.43
	151	216.41	151.58	138.42	290
	152	374.73	40.2	355.98	396.18
	153	356.19	37.43	339.27	376.7
	154	302.28	114.7	225.04	339.74
	155	333.42	29.96	320.71	350.67
	156	235.66	79.48	203.37	282.85
	157	311.2	15.3	307.01	322.31

## Sheet: 4Partitions
Independent rate model CAT-GTR tree 4 partitions Uniform calibrations
All ages in millions of years
	Node	Mean	Confidence intervaI width	Lower estimate	Upper estimate
	81	758.45	78.85	722.95	801.8
	82	690.33	35.88	673.24	709.12
	83	654.98	23.38	643.51	666.89
	84	580.12	68.5	542.66	611.16
	85	429.62	27.84	420.96	448.8
	86	65.52	14.25	61.7	75.95
	87	636.13	18.48	626.86	645.34
	88	610.72	26.28	597	623.28
	89	580.23	28.08	566.42	594.5
	90	536.42	13.75	532.13	545.88
	91	483.6	31.82	470.83	502.65
	92	500.02	55.42	477.94	533.36
	93	453.68	82.42	411.89	494.31
	94	622.77	19.23	613.11	632.34	Ecdysozoa
	95	589.85	43.69	564.8	608.49	Scalidophora
	96	558.27	54.78	528.02	582.8	Priapulida + Kinorhyncha
	97	476.9	105.71	414.73	520.44	Priapulida
	98	54.12	43.18	35.86	79.04
	99	419.57	152.56	329.08	481.64
	100	136.69	159.9	58.51	218.41
	101	610.21	20.07	600.12	620.19	Cryptovermes
	102	540.56	59.4	507.27	566.67	Nematoida
	103	398.68	141.48	318.27	459.75	Nematomorpha
	104	448.14	80.49	406.89	487.38	Nematoda
	105	375.45	103.66	320.66	424.32
	106	226.23	122.19	176.52	298.71
	107	301	84.93	259.24	344.17
	108	203.66	89.84	159.47	249.31
	109	199.29	90.12	153.76	243.88
	110	599.13	20.4	588.98	609.38	Panarthropoda
	111	464.61	87.29	418.84	506.13	Tardigrada
	112	325.77	122.2	265.84	388.04
	113	58.45	44.59	39.94	84.53
	114	325.92	94.43	286.39	380.82
	115	220.86	86.54	179.88	266.42
	116	173.24	85.13	131.72	216.85
	117	583.64	20.66	573.46	594.12	Onychophora + Arthropoda
	118	172.87	90.02	143.36	233.38	Onychophora
	119	42.1	34.8	26.86	61.66
	120	565.06	20.18	555.19	575.37	Arthropoda (Euarthropoda)
	121	542.99	22.67	532.01	554.68	Chelicerata
	122	437.39	25.4	430.02	455.42
	123	504.07	11.72	500.6	512.32
	124	473.82	26.81	460.41	487.22
	125	436.05	51.31	406.79	458.1
	126	443.09	22.95	435.43	458.38
	127	320.38	67.18	299.5	366.68
	128	551.41	20.89	541.34	562.23	Mandibulata
	129	503.25	39.27	483.64	522.91
	130	449.84	46.19	427.91	474.1
	131	389.5	23.27	382.89	406.16
	132	443.49	45.54	425.54	471.08
	133	312.75	163.03	216.65	379.68
	134	413	64.19	380.11	444.3
	135	521.58	18.8	514.41	533.21	Pancrustacea
	136	247.38	125.57	191.12	316.69
	137	178.95	111.6	126.27	237.87
	138	502.33	23.78	491.24	515.02
	139	461.84	52.08	432.6	484.68
	140	280.11	140.58	201.58	342.16
	141	487.74	25.95	475.61	501.56
	142	412.88	24.81	405.24	430.05
	143	42.22	33.69	27.43	61.12
	144	464.65	29.17	450.35	479.52
	145	435.24	30.83	420.09	450.92
	146	407.26	29.81	392.89	422.7
	147	363.61	60.77	330.07	390.84
	148	385.71	27.42	372.52	399.94
	149	333.66	34.52	320.62	355.14
	150	306.82	50.66	279.77	330.43
	151	209.91	129.31	140.86	270.17
	152	371.85	26.13	359.42	385.55
	153	353.57	23.62	342.51	366.13
	154	302.22	66.98	259.03	326.01
	155	331.21	18.8	322.8	341.6
	156	229.67	62.22	203.44	265.66
	157	308.89	7.24	306.95	314.19

## Sheet: 5Partitions
Independent rate model CAT-GTR tree 5 partitions Uniform calibrations
All ages in millions of years
	Node	Mean	Confidence intervaI width	Lower estimate	Upper estimate
	81	763.26	70.24	731.01	801.25
	82	702.76	38.39	684.67	723.06
	83	662.12	24.94	650.61	675.55
	84	586.45	63.81	552.19	616
	85	428.28	25.44	420.9	446.34
	86	64.28	9.72	61.67	71.39
	87	640.3	19.15	631.81	650.96
	88	615.2	26.19	602.16	628.35
	89	583.09	27.28	569.71	596.99
	90	536.03	12.98	532.12	545.1
	91	484.45	31.84	470.95	502.79
	92	500.1	54.02	478.09	532.11
	93	458.07	73.18	422.19	495.37
	94	626.5	19.26	617.21	636.47	Ecdysozoa
	95	599.43	36.94	578.91	615.85	Scalidophora
	96	567.69	48.35	541.24	589.59	Priapulida + Kinorhyncha
	97	491.75	88.94	441.05	529.99	Priapulida
	98	46.82	31.94	31.85	63.79
	99	428.57	128.57	355.04	483.61
	100	144.07	145.36	70.55	215.91
	101	614.52	20.05	604.79	624.84	Cryptovermes
	102	549.84	47.99	524.11	572.1	Nematoida
	103	410.35	115.43	346.45	461.88	Nematomorpha
	104	457.38	69.13	421.99	491.12	Nematoda
	105	388.82	85.59	344.65	430.24
	106	232.56	113.1	187.77	300.87
	107	303.85	75.4	266.38	341.78
	108	204.57	80.63	164.12	244.75
	109	201.82	82.78	159.25	242.03
	110	603.5	20.38	593.57	613.95	Panarthropoda
	111	466.19	76.5	426.64	503.14	Tardigrada
	112	324.24	104.06	277.78	381.84
	113	54.94	36.06	39.13	75.19
	114	321.99	79.02	289.8	368.82
	115	218.09	71.93	182.83	254.76
	116	172.23	72.45	136.67	209.12
	117	587.39	20.73	577.28	598.01	Onychophora + Arthropoda
	118	165.41	70.54	142.97	213.51	Onychophora
	119	38.27	29.14	25.61	54.75
	120	567.19	19.99	557.49	577.48	Arthropoda (Euarthropoda)
	121	545	21.84	534.28	556.12	Chelicerata
	122	436.04	21.08	429.97	451.05
	123	503.57	10.16	500.59	510.75
	124	473.49	24.98	461.13	486.11
	125	440.31	41.16	418.9	460.06
	126	442.99	21.84	435.45	457.29
	127	317.01	58.27	299.38	357.65
	128	554	20.38	544.19	564.57	Mandibulata
	129	504.65	36.64	486.25	522.89
	130	449.19	41.73	429.18	470.91
	131	388.36	19.79	382.86	402.65
	132	444.84	44.97	425.74	470.71
	133	313.4	153.03	222.97	376
	134	417.78	59.81	386.33	446.14
	135	521.46	18.33	514.44	532.77	Pancrustacea
	136	239.28	113.88	194.81	308.69
	137	174.13	99.43	130.04	229.47
	138	503.6	21.77	493.75	515.52
	139	468.14	44.66	442.38	487.04
	140	282	124.96	210.4	335.36
	141	490.27	23.56	479.16	502.72
	142	412	22.43	405.22	427.65
	143	40.68	29.09	27.91	57
	144	467.05	27.07	453.63	480.7
	145	435.72	28.41	421.55	449.96
	146	405.88	27.11	392.61	419.72
	147	367.43	51.05	339.02	390.07
	148	383.51	24.52	371.76	396.28
	149	333.29	31.83	320.69	352.52
	150	307.29	43.02	285.38	328.4
	151	219.51	127.47	146.01	273.48
	152	371.08	23.78	359.78	383.56
	153	353.25	21.2	343.26	364.46
	154	306.52	48.73	277.67	326.4
	155	330.89	16.54	323.37	339.91
	156	228.6	56.92	203.71	260.63
	157	308.59	6.11	306.94	313.05

## Sheet: 5%Cauchy
Independent rate model CAT-GTR tree No partitioning 5% Cauchy calibrations ("optimistic")
Ages in millions of years
	Node	Mean	Confidence intervaI width	Lower estimate	Upper estimate
	81	703.38	130.94	654.36	785.3
	82	639.31	22.75	629.58	652.33
	83	623.96	25.21	610.66	635.87
	84	559.99	83.27	520.2	603.47
	85	435.43	31.95	421.31	453.26
	86	79.82	66.82	62.07	128.89
	87	611.01	27.51	597.03	624.54
	88	591.17	38.86	570.71	609.57
	89	569	39.8	549.93	589.73
	90	538.71	16.14	532.25	548.39
	91	493.77	50.46	471.47	521.93
	92	505.51	70.64	477.9	548.54
	93	436.5	185.73	324.56	510.29
	94	598.35	29.42	583.54	612.96	Ecdysozoa
	95	565.8	53.42	538.51	591.93	Scalidophora
	96	537.28	47.61	518.32	565.93	Priapulida + Kinorhyncha
	97	377.24	185.88	309.96	495.84	Priapulida
	98	67.67	144.81	21.64	166.45
	99	391.51	252.55	243.92	496.47
	100	126.92	237.42	36.46	273.88
	101	587.35	30.39	572.41	602.8	Cryptovermes
	102	489.28	134.37	419.39	553.76	Nematoida
	103	255	312.57	110.56	423.13	Nematomorpha
	104	402.62	172.01	315.62	487.63	Nematoda
	105	323.99	201.31	224.55	425.86
	106	201.33	209.15	111.44	320.59
	107	283.24	186.14	198.32	384.46
	108	190.22	153.92	132.55	286.47
	109	183.8	223.33	86.39	309.72
	110	578.12	30.64	563.3	593.94	Panarthropoda
	111	467.47	157.79	373.96	531.75	Tardigrada
	112	327.37	249.91	192.41	442.32
	113	71.84	142.57	23.89	166.46
	114	350.93	203.98	244.26	448.24
	115	240.93	225.16	132	357.16
	116	176.51	233.55	75.92	309.47
	117	566.77	29.85	552.4	582.25	Onychophora + Arthropoda
	118	175.47	118.83	143.34	262.17	Onychophora
	119	56.75	101	18.96	119.96
	120	554.07	27.9	540.51	568.41	Arthropoda (Euarthropoda)
	121	536.5	33.2	520.07	553.27	Chelicerata
	122	453.9	66.97	430.58	497.55
	123	509.19	25.35	500.8	526.15
	124	482.06	49.96	455.59	505.55
	125	421.26	170.85	309.47	480.32
	126	453.38	46.74	435.87	482.61
	127	345.87	120.34	300.55	420.89
	128	543.39	28.64	529.82	558.46	Mandibulata
	129	506.65	60.03	474.57	534.6
	130	458.72	77.81	421.59	499.4
	131	402.34	60.5	383.35	443.85
	132	457.27	74.71	426.29	501
	133	320.66	291.15	145.17	436.32
	134	404.03	168.91	303.01	471.92
	135	523.51	26.61	514.41	541.02	Pancrustacea
	136	305.28	274.12	160.05	434.17
	137	211.86	273.32	88.05	361.37
	138	506.05	42.69	484.73	527.42
	139	454.19	132.83	369.14	501.97
	140	274.25	262.98	136.88	399.86
	141	492.24	47.3	467.74	515.04
	142	426.74	58.92	405.81	464.73
	143	58.96	136.94	17.96	154.9
	144	470.27	55.53	441.26	496.79
	145	443.92	60.8	413.35	474.15
	146	418.19	61.03	388.28	449.31
	147	368.41	95.59	323.07	418.66
	148	396.42	55.95	368.78	424.73
	149	351.32	73.45	321.7	395.15
	150	309.05	152.13	214.94	367.07
	151	211.73	172.86	134.14	307
	152	380.9	54	354.26	408.26
	153	361.47	52.74	337.16	389.9
	154	287.69	191.53	161.02	352.55
	155	338.35	46.26	319.14	365.4
	156	245.54	101.75	203.75	305.5
	157	315.4	28.91	307.15	336.06

## Sheet: 50%Cauchy
Independent rate model CAT-GTR tree No partitioning 50% Cauchy calibrations ("neutral")
Ages in millions of years
	Node	Mean	Confidence intervaI width	Lower estimate	Upper estimate
	81	703.76	131.4	654.45	785.85
	82	639.36	23.13	629.52	652.65
	83	623.88	25.32	610.81	636.13
	84	559.3	82.84	520.13	602.97
	85	435.46	31.99	421.31	453.3
	86	79.78	66.75	62.07	128.82
	87	610.86	28.16	596.62	624.78
	88	591.19	39.37	570.51	609.88
	89	568.93	39.73	549.98	589.71
	90	538.75	16.16	532.26	548.42
	91	493.64	50.56	471.44	522
	92	505.69	71.06	477.99	549.05
	93	438.58	182.22	328.19	510.41	Ecdysozoa
	94	598.23	31.05	582.74	613.79	Scalidophora
	95	565.93	53.85	538.5	592.35	Priapulida + Kinorhyncha
	96	537.44	47.87	518.36	566.23	Priapulida
	97	380.62	187.19	310.18	497.37
	98	68.09	144.56	21.68	166.24
	99	393.18	250.42	245.14	495.56
	100	127.64	254.44	36.31	290.75	Cryptovermes
	101	587.21	32.01	571.37	603.38	Nematoida
	102	488.81	134.53	420.94	555.47	Nematomorpha
	103	258.16	319.67	112.77	432.44	Nematoda
	104	400.92	167.93	317.54	485.47
	105	322.13	201.29	223.49	424.78
	106	197.7	214.05	104.02	318.07
	107	284.57	184.71	201.55	386.26
	108	190.27	155.8	132.65	288.45
	109	180.4	216.24	85.11	301.35	Panarthropoda
	110	577.91	31.74	562.49	594.23	Tardigrada
	111	462.66	179.82	352.24	532.06
	112	320.88	256.27	182.32	438.59
	113	71.09	140.78	23.62	164.4
	114	345.1	233.31	216.66	449.97
	115	235.83	235.57	128.04	363.61
	116	174.79	241.27	73.87	315.14	Onychophora + Arthropoda
	117	566.64	30.88	551.91	582.79	Onychophora
	118	175.76	125.66	143.25	268.91
	119	55.59	99.69	18.73	118.42	Arthropoda (Euarthropoda)
	120	553.78	28.85	540.25	569.1	Chelicerata
	121	536.25	33.27	519.91	553.18
	122	452.33	62.49	430.59	493.08
	123	509.38	26.16	500.8	526.96
	124	482.3	50.9	455.65	506.55
	125	422.84	171.73	308.81	480.54
	126	453.73	48.2	435.89	484.09
	127	345.25	116.39	300.66	417.05	Mandibulata
	128	543.05	29.29	529.37	558.66
	129	506.58	60.35	474.65	535
	130	459.45	79.04	421.92	500.96
	131	402.57	60.62	383.36	443.98
	132	457.43	73.76	426.35	500.11
	133	324.29	282.26	156.6	438.86
	134	404.99	171.88	301.27	473.15	Pancrustacea
	135	523.18	24.99	514.4	539.39
	136	306.33	295.3	153.66	448.96
	137	211.23	288.46	81.53	369.99
	138	505.22	42.13	483.17	525.3
	139	454.23	131.66	369.21	500.87
	140	276.71	256.88	138.53	395.41
	141	491.1	47.46	465.88	513.34
	142	426.89	59.12	405.8	464.92
	143	57.38	136.49	17.59	154.08
	144	468.9	54.53	440.36	494.89
	145	442.39	59.06	412.76	471.82
	146	416.55	58	388.36	446.36
	147	367.12	93.98	322.88	416.86
	148	394.87	55.07	368.04	423.11
	149	349.95	69.23	321.58	390.81
	150	306.57	152.06	210.49	362.55
	151	210.96	173.27	134.67	307.94
	152	379.27	53.52	353.33	406.85
	153	359.9	50.79	336.31	387.1
	154	290.75	184.36	167.73	352.09
	155	337.33	43.98	318.9	362.88
	156	245.98	101.02	203.68	304.7
	157	314.9	27.61	307.13	334.74

## Sheet: 95%Cauchy
Independent rate model CAT-GTR tree No partitioning 95% Cauchy calibrations ("pessimistic")
Ages in millions of years
	Node	Mean	Confidence intervaI width	Lower estimate	Upper estimate
	81	703.17	130.96	654.39	785.35
	82	639.42	22.47	629.86	652.33
	83	624.19	24.75	611.17	635.92
	84	559.94	83.65	520.03	603.68
	85	435.49	31.89	421.31	453.2
	86	79.76	65.54	62.08	127.62
	87	611.25	27.59	597.04	624.63
	88	591.55	37.9	571.9	609.8
	89	569.47	39.53	550.69	590.22
	90	538.74	16.18	532.26	548.44
	91	494.13	50.73	471.43	522.16
	92	505.89	70.14	478.05	548.19
	93	437.73	185.11	324.72	509.83
	94	598.54	30.07	583.42	613.49	Ecdysozoa
	95	565.87	53.87	538.41	592.28	Scalidophora
	96	537.2	47.23	518.31	565.54	Priapulida + Kinorhyncha
	97	376.63	188.01	309.76	497.77	Priapulida
	98	68.32	144.94	21.47	166.41
	99	391.21	249.83	243.94	493.77
	100	125.14	223.63	36.38	260.01
	101	587.53	30.98	572.16	603.14	Cryptovermes
	102	488.35	133.06	420.84	553.9	Nematoida
	103	260.34	308.2	113.98	422.18	Nematomorpha
	104	401.55	166.41	318.97	485.38	Nematoda
	105	324.72	196.29	229.37	425.66
	106	199.4	212.37	106.85	319.22
	107	285.06	176.96	206.07	383.03
	108	190.33	150.56	132.8	283.36
	109	180.56	204.79	86.82	291.61
	110	578.27	31.2	563.24	594.44	Panarthropoda
	111	466.51	167.94	366.59	534.53	Tardigrada
	112	326.75	250.65	189.11	439.76
	113	72.45	145.85	23.78	169.63
	114	349.94	227.53	226.1	453.63
	115	240.76	232.99	129.84	362.83
	116	176.37	235.76	75.53	311.29
	117	566.92	30.83	552.29	583.12	Onychophora + Arthropoda
	118	176.96	130.25	143.22	273.47	Onychophora
	119	56.45	101.89	19.16	121.05
	120	554.25	30.1	540.56	570.66	Arthropoda (Euarthropoda)
	121	536.55	33.97	520.12	554.09	Chelicerata
	122	453.21	67.4	430.5	497.9
	123	509.55	27.18	500.81	527.99
	124	482.07	52.29	455.09	507.38
	125	423.73	162.97	316.87	479.84
	126	453.58	47.73	435.83	483.56
	127	346.5	120.49	300.61	421.1
	128	543.63	29.91	529.97	559.88	Mandibulata
	129	505.99	61.99	472.87	534.86
	130	458.68	77.83	421.95	499.78
	131	402.32	59.3	383.3	442.6
	132	456.49	73.31	426.29	499.6
	133	320.05	287.41	150.13	437.54
	134	403.52	165.82	304.07	469.89
	135	523.86	26.33	514.41	540.74	Pancrustacea
	136	298.2	282.44	153.56	436
	137	202.56	277.69	78.39	356.08
	138	506.54	42.14	484.76	526.9
	139	457.31	124.63	378.43	503.06
	140	286.76	275.97	139.11	415.08
	141	492.79	45.78	469.08	514.86
	142	427.81	62.29	405.83	468.12
	143	59.76	142.55	18.02	160.57
	144	470.76	54.83	442.23	497.06
	145	443.95	59.2	414.27	473.47
	146	417.62	57.71	389.11	446.82
	147	366.51	92.36	322.72	415.08
	148	395.98	54.29	368.97	423.26
	149	351.14	70.29	321.65	391.94
	150	307.49	150.52	212.57	363.09
	151	209.24	171.84	134.03	305.87
	152	380.57	53.83	353.97	407.8
	153	361.23	52.31	336.75	389.06
	154	291.92	179.73	172.92	352.65
	155	338.34	46.09	319.27	365.36
	156	245.29	98.84	203.67	302.51
	157	315.38	29.03	307.12	336.15

## Sheet: Nematoda + Tardigrada
Independent rate model Nematoda + Tardigrada tree No partitioning Uniform calibrations
Ages in 100s of millions of years
	Node	Mean	Confidence intervaI width	Lower estimate	Upper estimate
	80	7.5564	1.6168	6.7342	8.351
	81	7.0609	1.2898	6.5719	7.8617
	82	6.4253	0.2373	6.3236	6.5609
	83	6.285	0.2239	6.159	6.3829
	84	5.6108	0.863	5.1989	6.0619
	85	4.3554	0.3196	4.213	4.5326
	86	0.8013	0.6707	0.621	1.2917
	87	6.1731	0.2613	6.0318	6.2931
	88	5.96	0.3944	5.7491	6.1435
	89	5.7226	0.4216	5.5212	5.9428
	90	5.3892	0.1623	5.3226	5.4849
	91	4.9396	0.5101	4.7146	5.2247
	92	5.0642	0.6987	4.7809	5.4796
	93	4.3681	1.864	3.236	5.1
	94	6.0685	0.2936	5.9125	6.2061	Ecdysozoa
	95	5.7534	0.6195	5.4101	6.0296	Scalidophora
	96	5.4387	0.6161	5.1852	5.8013	Priapulida + Kinorhyncha
	97	4.307	2.0832	3.1538	5.237	Priapulida
	98	0.685	1.649	0.223	1.872
	99	3.9797	2.4601	2.562	5.0221
	100	1.2978	2.6503	0.3718	3.0221
	101	5.9642	0.3219	5.7947	6.1166	Cryptovermes
	102	5.5937	0.7088	5.1809	5.8897	Nematomorpha + (Nematoda + Tardigrada)
	103	3.6122	2.9783	2.0301	5.0084	Nematomorpha
	104	5.3145	0.8461	4.8462	5.6923	Nematoda + Tardigrada
	105	4.4751	1.3987	3.6967	5.0954	Tardigrada
	106	3.1537	2.193	1.9874	4.1804
	107	0.6836	1.3426	0.2451	1.5877
	108	3.3729	1.9601	2.3479	4.308
	109	2.3926	2.0806	1.3359	3.4165
	110	1.7801	2.2152	0.7387	2.9539
	111	4.4757	1.4923	3.6231	5.1154	Nematoda
	112	3.7714	1.7321	2.8389	4.571
	113	2.6029	1.9009	1.6636	3.5645
	114	3.0887	1.8193	2.226	4.0453
	115	2.0272	1.666	1.3444	3.0104
	116	2.0229	2.3147	0.9072	3.2219
	117	5.83	0.3544	5.6466	6.001	Onychophora + Arthropoda
	118	2.2572	2.422	1.4558	3.8778	Onychophora
	119	0.5929	1.2017	0.1989	1.4006
	120	5.6789	0.3683	5.4949	5.8632	Arthropoda (Euarthropoda)
	121	5.4687	0.4392	5.2506	5.6898	Chelicerata
	122	4.5533	0.7244	4.3064	5.0308
	123	5.1315	0.3465	5.0102	5.3567
	124	4.8454	0.5562	4.5659	5.1221
	125	4.2674	1.6414	3.2029	4.8443
	126	4.5467	0.5083	4.3593	4.8676
	127	3.4401	1.1705	3.0053	4.1758
	128	5.5544	0.3856	5.3631	5.7487	Mandibulata
	129	5.1478	0.6849	4.7903	5.4752
	130	4.6373	0.8681	4.2249	5.093
	131	4.036	0.6486	3.8336	4.4822
	132	4.6154	0.8171	4.2669	5.084
	133	3.2508	2.7826	1.6141	4.3967
	134	4.0947	1.7051	3.0808	4.7859
	135	5.3124	0.3891	5.1505	5.5396	Pancrustacea
	136	3.1916	2.7011	1.7682	4.4693
	137	2.2889	2.7351	0.9492	3.6843
	138	5.1294	0.5162	4.8748	5.391
	139	4.6143	1.3909	3.7336	5.1245
	140	2.8159	2.6826	1.4183	4.1009
	141	4.9798	0.5573	4.7057	5.263
	142	4.2932	0.6705	4.0587	4.7292
	143	0.5591	1.2575	0.1823	1.4398
	144	4.745	0.6244	4.4323	5.0567
	145	4.4622	0.6473	4.1491	4.7964
	146	4.1901	0.6109	3.9044	4.5153
	147	3.6756	0.974	3.2277	4.2017
	148	3.9649	0.5634	3.699	4.2624
	149	3.5102	0.7075	3.2156	3.9231
	150	3.1054	1.3694	2.2824	3.6518
	151	2.1467	1.7177	1.3549	3.0726
	152	3.8048	0.5311	3.545	4.0761
	153	3.6052	0.507	3.3653	3.8723
	154	2.888	1.7876	1.6999	3.4875
	155	3.3731	0.4332	3.1881	3.6213
	156	2.4509	1.0116	2.0374	3.049
	157	3.1486	0.2692	3.0712	3.3404

## Sheet: Vinctiplicata
Independent rate model Vinctiplicata tree No partitioning Uniform calibrations
Ages in 100s of millions of years
	Node	Mean	Confidence intervaI width	Lower estimate	Upper estimate
	80	7.5813	1.6525	6.7101	8.3626
	81	7.0632	1.3728	6.5432	7.916
	82	6.4234	0.2147	6.33	6.5447
	83	6.3173	0.1986	6.2046	6.4032
	84	5.6421	0.9007	5.203	6.1037
	85	4.3622	0.3206	4.2136	4.5342
	86	0.8813	0.8708	0.6234	1.4942
	87	6.2364	0.225	6.1104	6.3354
	88	6.0009	0.4478	5.7546	6.2024
	89	5.7558	0.4913	5.5174	6.0087
	90	5.3974	0.1648	5.3232	5.488
	91	4.9589	0.5428	4.715	5.2578
	92	5.1275	0.8301	4.7849	5.615
	93	4.3207	2.0408	3.1764	5.2172
	94	6.1639	0.2586	6.0222	6.2808	Ecdysozoa
	95	5.7649	0.7482	5.3413	6.0895	Scalidophora
	96	5.5679	0.7677	5.1981	5.9658	Priapulida + Loricifera
	97	4.3358	2.261	3.1588	5.4198	Priapulida
	98	0.8871	2.2085	0.2039	2.4124
	99	4.1991	2.9809	2.4426	5.4235
	100	1.5194	3.167	0.3379	3.5049
	101	6.0935	0.2825	5.9386	6.2211	Cryptovermes
	102	5.4536	1.1766	4.7708	5.9474	Nematoida
	103	3.5041	3.4606	1.6634	5.124	Nematomorpha
	104	4.6218	1.7225	3.6653	5.3878	Nematoda
	105	3.7379	2.4352	2.442	4.8772
	106	2.3772	2.7136	1.0493	3.7629
	107	3.2335	2.2059	2.1843	4.3902
	108	2.1089	1.9772	1.3358	3.313
	109	2.1197	2.6869	0.8361	3.523
	110	6.0268	0.2999	5.8621	6.162	Panarthropoda
	111	5.8169	0.3766	5.6256	6.0022	Tardigrada
	112	5.5929	0.3613	5.4262	5.7875
	113	5.336	0.17	5.2894	5.4594
	114	4.2117	2.7493	2.6081	5.3574
	115	3.0409	3.1393	1.4094	4.5487
	116	2.2649	3.1065	0.7659	3.8724
	117	5.9013	0.3563	5.7115	6.0678	Onychophora + Arthropoda
	118	2.504	3.0119	1.4694	4.4813
	119	0.7915	1.9344	0.1901	2.1245
	120	5.7638	0.4089	5.5532	5.9621	Arthropoda (Euarthropoda)
	121	5.5424	0.5177	5.2731	5.7908	Chelicerata
	122	4.6328	0.8645	4.3095	5.174
	123	5.1916	0.4943	5.0135	5.5078
	124	4.8923	0.6839	4.5598	5.2437
	125	4.2111	1.8529	3.06	4.9129
	126	4.582	0.6032	4.3608	4.964
	127	3.522	1.3172	3.0086	4.3258
	128	5.6432	0.4365	5.4199	5.8564	Mandibulata
	129	5.2531	0.7864	4.8306	5.617
	130	4.7339	1.0159	4.2404	5.2563
	131	4.1017	0.8221	3.8362	4.6583
	132	4.6983	0.967	4.2727	5.2397
	133	3.2731	3.3861	1.2281	4.6142
	134	4.0361	2.4273	2.4917	4.919
	135	5.4123	0.5003	5.1653	5.6656	Pancrustacea
	136	3.3145	3.0347	1.5676	4.6023
	137	2.3057	3.117	0.7811	3.8981
	138	5.2316	0.607	4.916	5.523
	139	4.6541	1.7321	3.5497	5.2818
	140	2.9054	3.0367	1.3372	4.3739
	141	5.0751	0.6437	4.7398	5.3835
	142	4.3604	0.8017	4.0619	4.8636
	143	0.7599	1.9816	0.1705	2.1521
	144	4.8344	0.6998	4.4724	5.1722
	145	4.5521	0.7272	4.2012	4.9284
	146	4.2824	0.6909	3.9392	4.6301
	147	3.725	1.0718	3.2271	4.2989
	148	4.0471	0.6229	3.7288	4.3517
	149	3.5793	0.8054	3.2225	4.0279
	150	3.0731	1.845	1.895	3.74
	151	2.0699	1.7985	1.3347	3.1332
	152	3.8668	0.5437	3.5685	4.1122
	153	3.6606	0.5773	3.3769	3.9542
	154	2.8338	2.2701	1.3275	3.5976
	155	3.4199	0.5231	3.196	3.7191
	156	2.5002	1.1244	2.0384	3.1628
	157	3.1766	0.3529	3.072	3.4249

[truncated: 2 more sheets: Tactopoda, Labiocarida]
